# Supplementary material for: Challenges and opportunities for Moringa growers in southern Ethiopia and Kenya
Source: PLOS journal article supplement (doi:10.1371/journal.pone.0187651), 2017-11-09
Supplement: S3 (10.1371/journal.pone.0187651.s003) [file journal.pone.0187651.s003]

**S3 Appendix. Questionnaire used for the survey in southern Ethiopia.****Moringa spp as a multi-nutrient dietary source (on farm/ home garden) - general-2****Country**

- ☐ Ethiopia
- ☐ Kenya
- ☐ India
- ☐ Malawi
- ☐ Malaysia
- ☐ Tanzania

**GPS location**

*GPS coordinates can only be collected when outside.*

latitude (x.y °)

longitude (x.y °)

altitude (m)

accuracy (m)

**Household ID****What is the gender of the household head?**

- ☐ Female
- ☐ Male

**Marital status**

- ☐ Married
- ☐ Single
- ☐ Other

**If the marital status is other, please give details**

**How old is the household head (years)?**

**How many members does the household have?**

**For how long have you been growing Moringa (years)?**

**Species**

- ☐ Moringa arborea
- ☐ Moringa borziana
- ☐ Moringa concanensis
- ☐ Moringa drouhardii
- ☐ Moringa hildebrandtii
- ☐ Moringa longituba
- ☐ Moringa oleifera
- ☐ Moringa ovalifolia
- ☐ Moringa peregrina
- ☐ Moringa pygmaea
- ☐ Moringa riva subsp. longisilqua
- ☐ Moringa riva subsp. riva
- ☐ Moringa ruspoliana
- ☐ Moringa stenopetala

**Why do you plant Moringa?**

- ☐ Food
- ☐ Medicine
- ☐ Shade
- ☐ Ornament
- ☐ Shelterbelt
- ☐ Feed
- ☐ Green manure
- ☐ Other

**Additional comment on reasons of growing Moringa**

---

**How do you use the different parts of Moringa tree for food?**

---

**How do you use the different parts of Moringa tree as medicine?**

---

**Moringa samples collected**

- ☐ Mature leaves
- ☐ Young leaves
- ☐ Green pods
- ☐ Seeds
- ☐ Roots

**Moringa tree****Moringa leaves****Moringa green pods****Moringa seed****Root samples****Soil sample**
