# Supplementary material for: Challenges and opportunities for Moringa growers in southern Ethiopia and Kenya
Source: PLOS journal article supplement (doi:10.1371/journal.pone.0187651), 2017-11-09
Supplement: S4 (10.1371/journal.pone.0187651.s004) [file journal.pone.0187651.s004]

**S4 Appendix. Questionnaire used for the survey in Kenya.****KEFRI Questionnaire****Background****Country**☐ Ethiopia☐ Kenya**GPS Location***GPS coordinates can only be collected when outside.*

latitude (x.y °)

longitude (x.y °)

altitude (m)

accuracy (m)

**Date of interview**

yyyy-mm-dd

hh:mm

**Name of interviewer**☐ Charles Magare☐ David Odee☐ James Gitu**Name of Interviewee/farmer****Household ID****What is the gender of the household head?**☐ Female☐ Male**How old is the household head (years)?****Marital status**☐ Married☐ Single☐ Other

**If the marital status is other, please give details**

---

**What is the highest educational achievement of household head?**

- ☐ Illiterate
- ☐ Elementary
- ☐ Highschool
- ☐ College/University

**How many people (full time residents) live in the household/farm?**

---

**What is your ethnic group?**

---

#### **Land tenure**

**How is the land owned?**

- ☐ Own
- ☐ Rental
- ☐ Communal
- ☐ Others

**If Others, please specify**

---

**What is the approximate size/acreage of your farm?**

- ☐ 1-3 acres
- ☐ 4-10 acres
- ☐ 11-15 acres
- ☐ 16-20 acres
- ☐ > 20 acres

**Are you engaged in any other off farm income generating activities?**

- ☐ Yes
- ☐ No

If 'yes', what's the activity/ profession?

- ☐ Formal
- ☐ Self-employed
- ☐ Casual labour
- ☐ Others

If 'Formal', please specify

---

If 'Others', please specify

---

What crops do you grow on the farm? (Rank in order of importance)

---

Do you keep any livestock?

- ☐ Yes
- ☐ No

If 'Yes', list/rank in order of importance

---

For how long have you grown Moringa (years)?

---

Why do you plant Moringa?

- ☐ Food
- ☐ Medicine
- ☐ Shade
- ☐ Ornament
- ☐ Shelterbelt
- ☐ Feed
- ☐ Green manure
- ☐ Other

**What part of the tree did you use to plant?**

- ☐ Seed
- ☐ Seedlings
- ☐ Branch cuttings
- ☐ Stem cuttings

**Where (or from who/whom) did you source your planting material?**

---

**Species**

- ☐ Moringa oleifera
- ☐ Moringa stenopetala

**How do you use Moringa? Prompt with the list below if not mentioned**

- ☐ Leaves
- ☐ Bark
- ☐ Twigs
- ☐ Roots/tubers
- ☐ Green pods
- ☐ Stems
- ☐ Dry pods
- ☐ Branches
- ☐ Seeds
- ☐ Flowers
- ☐ Whole plant
- ☐ Fodder for livestock
- ☐ Firewood for cooking
- ☐ Water clarification
- ☐ Agroforestry: intercrop, hedge, boundary, aesthetic, green manure, shade, etc
- ☐ Other

**Description of use**

---

**Description of use-1**

---

**Description of use-2**

---

**Description of use-3**

---

**Description of use-4**

---

**Do you sell any of the Moringa plant parts or products?**

- ☐ Yes
- ☐ No

**If 'Yes', list Moringa plant parts/products, value and buyers (namely green leaves, dry leaves, green pods, dry pods, seeds, fresh flowers, dry flowers, branches, stem roots, tubers, firewood**

---

**If 'Yes', list Moringa plant parts/products, value and buyers (namely green leaves, dry leaves, green pods, dry pods, seeds, fresh flowers, dry flowers, branches, stem roots, tubers, firewood**

---

**Management**

**How often do you harvest or extract Moringa parts for use or sale?**

- ☐ Monthly
- ☐ Quarterly
- ☐ Bi-annually
- ☐ Annually
- ☐ Other

**If 'other', please specify**

---

**What is the estimated number of Moringa tree/saplings on the farm?**

- ☐ 0-30
- ☐ 30-60
- ☐ 60-100
- ☐ > 100

**Have you experienced any problems with pest, disease or livestock/wildlife damage? Moringa tree?**

- ☐ Yes
- ☐ No

If yes, describe the causal agent, type and part of the tree damaged

- ☐ Leaves
- ☐ Roots/Tuber
- ☐ Stems
- ☐ Green pods
- ☐ Dry pods
- ☐ Branches
- ☐ Seeds
- ☐ Flowers

Description of the damage

---

Description of the damage

---

Description of the damage

---

If pest or disease attack, what period, season or time of the year when it most severe?

---

What intervention or control methods did you use?

---

Do you have any questions or comments about Moringa or general comments?

---

Would like to receive or know more information regarding Moringa?

- ☐ Yes
- ☐ No

Observations to be made by the interviewing team (planting configuration, location, regeneration, management)

---

**What is the tree arrangement on the farm?**

- ☐ Scattered
- ☐ Isolated
- ☐ Lines
- ☐ Woodlot

**Where on the farm the trees are planted/located?**

- ☐ Farm/home boundary
- ☐ Hedge
- ☐ Intercropping with other crops

**Are there any signs of natural regeneration or fresh plantings?**

- ☐ Young seedlings
- ☐ Saplings
- ☐ Sprouting
- ☐ None

**How are the Moringa trees managed or tended?**

- ☐ Coppicing
- ☐ Pruning
- ☐ Lopping
- ☐ Pollarding
- ☐ Spot weeding
- ☐ Clear weeding

**Where do you get water for domestic use?**

---

**Do you find it necessary to cleanse or purify water for domestic use?**

- ☐ Yes
- ☐ No

**If 'Yes', how do you treat your water?**

---

**From what material is your house roof made?**

---

**From what material is your house floor made?**

---

**Do you have electricity in your house?**

☐ Yes

☐ No

**Moringa samples collected**

☐ Mature leaves

☐ Young leaves

☐ Green pods

☐ Seeds

☐ Roots

**Leaves sample ID**

---

**Green pod sample ID**

---

**Seed sample ID**

---

**Soil sample ID**

---

**Moringa tree**

**Moringa leaves**

**Moringa green pods**

**Moringa seed**

**Root samples**



**Soil samples**

**What in-the-field treatment is applied to the sample? (e.g., washing with water)**

---

**What is the approximate height of the tree? (metres)**

---

**What is the approximate diameter at breast height of the tree? (centimetres)**

---

**At what depth was the soil sample taken? (centimetres)**

---

**Estimate the distance between soil sampling point/s and the base of the Moringa tree (metres)**

---

Thanks for completing the questionnaire!
